# Supplementary material
Source: MDPI journal article supplement (https://www.mdpi.com/2571-6255/6/2/67)

1AP

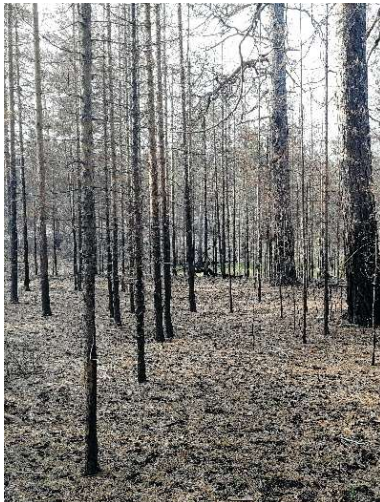

23AP

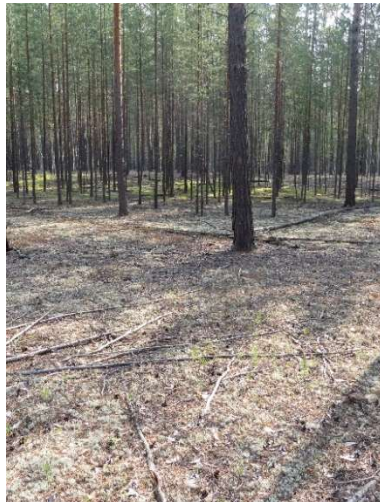

45AP

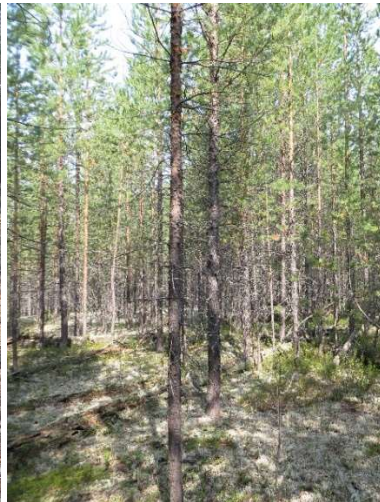

79AP

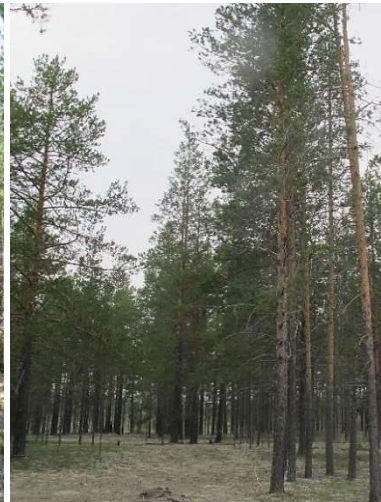

121AP

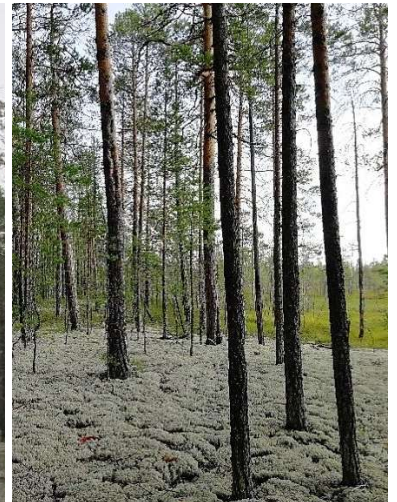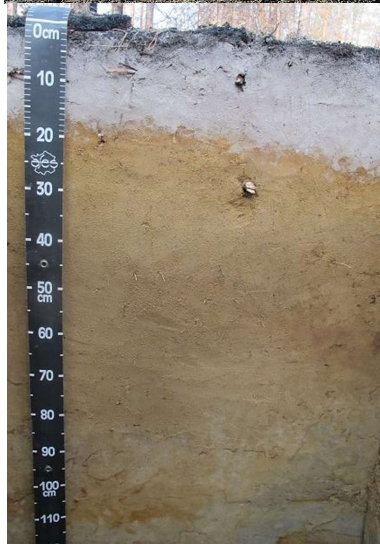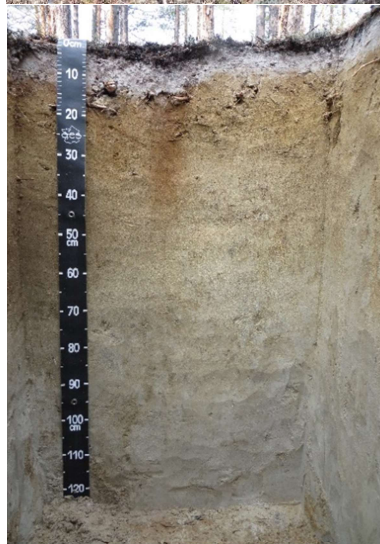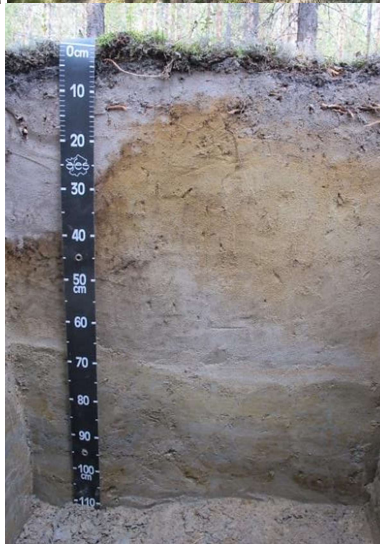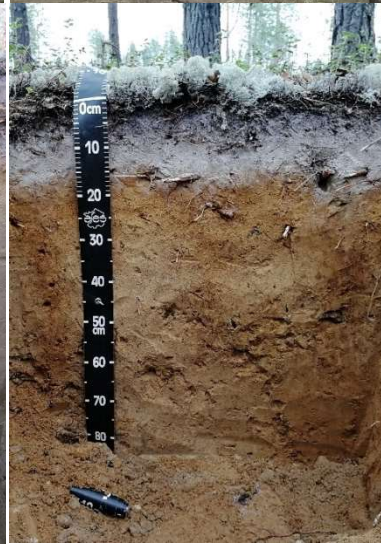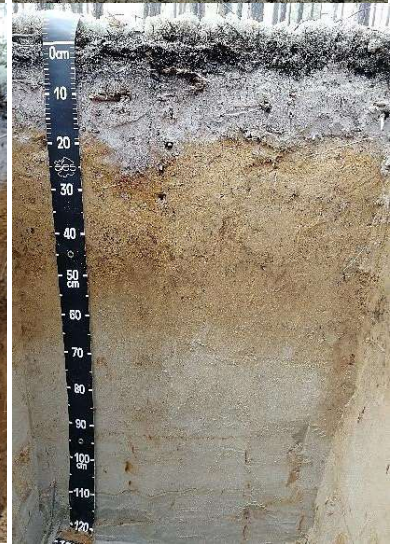

**Figure S1.** Photos of landscapes and soil profiles of studied plots.

Supplement: s1 [file s1]
